# Supplementary material
Source: PubMed Central journal article supplement (PMC6363903)
Supplement: NIHMS1502575-supplement-Supplemental_Digital_Content_to_Be_Published__cited_in_text_.pdf [file NIHMS1502575-supplement-Supplemental_Digital_Content_to_Be_Published__cited_in_text_.pdf]

## **Abbreviations**

BMI: body mass index

BUN: blood urea nitrogen

CPRA: calculated panel reactive antibodies

eGFR: estimated glomerular filtration rate

ESRD: end-stage renal disease

HLA: human leukocyte antigens

HBV: hepatitis B virus

HCV: hepatitis C virus

HIV: human immunodeficiency virus

INR: international normalized ratio

Table S1: Pooled coefficients of multivariate Cox proportional hazard model of 1-year posttransplant patient survival using SRTR variables

|                                | Covariates                                 | Coefficients          | 95% Confidence Interval | P Value |
|--------------------------------|--------------------------------------------|-----------------------|-------------------------|---------|
| Donor                          | Donor Age                                  | 1.53E-03              | (-2.47E-03, 5.54E-03)   | 0.45    |
|                                | Donor Blood Type                           | Reference             |                         |         |
|                                | O                                          | 7.23E-02              | (-1.06E-02, 0.16)       | 0.09    |
|                                | A                                          | 0.21                  | (9.71E-04, 0.41)        | 0.05    |
|                                | AB                                         | -4.23E-02             | (-0.17, 8.12E-02)       | 0.50    |
|                                | B                                          |                       |                         |         |
|                                | Donor Arginine Vasopressin                 |                       |                         |         |
|                                | Positive                                   | -6.57E-02             | (-1.42E-01, 1.03E-02)   | 0.09    |
|                                | Negative                                   | Reference             |                         |         |
|                                | Donor BUN in mg/dL                         | 2.79E-03              | (-0.14, 6.29E-03)       | 0.12    |
|                                | Donor Cigarette Use (> 20 pack years) Ever |                       |                         |         |
|                                | Positive                                   | -0.12                 | (-0.41, 0.17)           | 0.49    |
|                                | Unknown                                    | Reference             |                         |         |
|                                | Negative                                   | -0.10                 | (-0.38, 0.18)           | 0.42    |
|                                | Donor Creatinine                           | -2.65E-03             | (-2.06E-02, 1.53E-02)   | 0.77    |
| Donor eGFR                     | 4.43E-04                                   | (-7.84E-04, 1.67E-03) | 0.48                    |         |
| Donor Gender                   |                                            |                       |                         |         |
| Male                           | 1.33E-02                                   | (1.67E-03, 9.22E-02)  | 0.74                    |         |
| Female                         | Reference                                  |                       |                         |         |
| Donor Hematocrit               | 2.94E-03                                   | (-3.48E-03, 9.36E-03) | 0.37                    |         |
| Donor Hepatitis C Virus Result |                                            |                       |                         |         |
| Positive                       | 1.17E-01                                   | (-1.46E-01, 3.81E-01) | 0.38                    |         |
| Negative                       | Reference                                  |                       |                         |         |
| Donor KDRI                     | 4.08E-01                                   | (2.70E-01, 5.46E-01)  | <0.001                  |         |
| Kidney Transplanted Locally    | -5.79E-02                                  | (-1.61E-01, 4.48E-02) | 0.27                    |         |
| Kidney Pumped                  | 2.09E-02                                   | (-6.67E-02, 1.08E-01) | 0.64                    |         |
| Donor-Recipient                | HLA A Mismatches                           | -1.69E-02             | (-7.19E-02, 3.81E-02)   | 0.55    |
| Recipient                      | Age at Transplant                          | 3.85E-02              | (3.46E-02, 4.23E-02)    | <0.001  |
|                                | Latino                                     | -2.43E-01             | (-3.73E-01, -1.13E-01)  | <0.001  |
|                                | Race                                       | Reference             |                         |         |
|                                | Caucasian                                  | -2.68E-01             | (-4.46E-01, -8.90E-02)  | 0.003   |
|                                | Asian                                      | -1.42E-01             | (-2.39E-01, -4.53E-02)  | 0.004   |
|                                | Black                                      | -2.06E-01             | (-4.94E-01, 8.17E-02)   | 0.16    |
|                                | Other                                      |                       |                         |         |
|                                | Diabetes                                   |                       |                         |         |
|                                | None                                       | Reference             |                         |         |
|                                | Type 1                                     | 3.23E-01              | (1.24E-01, 5.22E-01)    | 0.001   |
|                                | Type 2                                     | 2.53E-01              | (1.23E-01, 3.83E-01)    | <0.001  |
|                                | Other                                      | 2.32E-01              | (5.05E-02, 4.14E-01)    | 0.01    |
| Education                      |                                            |                       |                         |         |
| Grade School/None              | -1.45E-01                                  | (-3.42E-01, 5.18E-02) | 0.15                    |         |
| High School                    | -5.43E-04                                  | (-1.38E-01, 1.37E-01) | 0.99                    |         |
| Technical/Some College         | 3.24E-02                                   | (-1.15E-01, 1.80E-01) | 0.67                    |         |
| College                        | -1.99E-02                                  | (-1.71E-01, 1.31E-01) | 0.80                    |         |
| Unknown/Missing                | Reference                                  |                       |                         |         |
| HBV Core Antibody              |                                            |                       |                         |         |
| Positive                       | 4.67E-02                                   | (-1.20E-01, 2.13E-01) | 0.58                    |         |
| Unknown/Missing                | Reference                                  |                       |                         |         |
| Negative                       | 8.04E-03                                   | (-1.08E-01, 1.24E-01) | 0.89                    |         |

|                                                  |           |                        |        |
|--------------------------------------------------|-----------|------------------------|--------|
| HCV Serostatus                                   |           |                        |        |
| Positive                                         | -6.94E-03 | (-2.82E-01, 2.69E-01)  | 0.96   |
| Unknown/Missing                                  | Reference |                        |        |
| Negative                                         | -1.36E-01 | (-3.54E-01, 8.28E-02)  | 0.22   |
| HIV Serostatus                                   |           |                        |        |
| Positive                                         | 5.27E-01  | (8.12E-02, 9.72E-01)   | 0.02   |
| Unknown/Missing                                  | Reference |                        |        |
| Negative                                         | 2.53E-01  | (1.11E-01, 3.95E-01)   | <0.001 |
| Had Previous Transplant                          | 2.54E-01  | (1.30E-01, 3.78E-01)   | <0.001 |
| Kidney Cold Ischemia Time in Hours               | 8.85E-03  | (4.47E-03, 1.32E-02)   | <0.001 |
| Kidney Primary Diagnosis at Transplant           |           |                        |        |
| Congenital, Rare Familial, & Metabolic Disorders | 1.76E-01  | (-1.85E-01, 5.37E-01)  | 0.34   |
| Diabetes                                         | 2.72E-01  | (1.16E-01, 4.27E-01)   | <0.001 |
| Glomerular Diseases                              | -1.02E-01 | (-2.42E-01, 3.79E-02)  | 0.15   |
| Hypertensive Nephrosclerosis                     | 1.19E-01  | (-4.55E-03, 2.42E-01)  | 0.06   |
| Unknown/Other                                    | Reference |                        |        |
| Most Recent CPRA                                 | 8.43E-04  | (-7.21E-04, 2.41E-03)  | 0.29   |
| Peripheral Vascular Disease                      |           |                        |        |
| Positive                                         | 3.67E-01  | (1.16E-01, 6.19E-01)   | 0.004  |
| Unknown                                          | Reference |                        |        |
| Negative                                         | -2.17E-02 | (-2.41E-01, 1.97E-01)  | 0.85   |
| Primary Payment                                  |           |                        |        |
| Public                                           | Reference |                        |        |
| Private/Other/Unknown                            | -2.97E-01 | (-3.99E-01, -1.95E-01) | <0.001 |
| Total ESRD Time at Transplant in Days            | 2.11E-04  | (1.81E-04, 2.41E-04)   | <0.001 |
| Total Serum Albumin at Listing                   | -2.03E-01 | (-2.78E-01, -1.28E-01) | <0.001 |

Table S2: Pooled coefficients of multivariate Cox proportional hazard model of 1-year posttransplant patient survival using SRTR variables and KPS

|                                | Covariates                                 | Coefficients          | 95% Confidence Interval | P Value |
|--------------------------------|--------------------------------------------|-----------------------|-------------------------|---------|
| Donor                          | Donor Age                                  | 1.30E-03              | (-2.72E-03, 5.31E-03)   | 0.53    |
|                                | Donor Blood Type                           | Reference             |                         |         |
|                                | O                                          | 7.11E-02              | (-1.18E-02, 0.15)       | 0.09    |
|                                | A                                          | 0.18                  | (-2.69E-02, 0.38)       | 0.09    |
|                                | AB                                         | -5.52E-02             | (-0.18, 6.85E-02)       | 0.38    |
|                                | B                                          |                       |                         |         |
|                                | Donor Arginine Vasopressin                 |                       |                         |         |
|                                | Positive                                   | -5.59E-02             | (-1.32E-01, 2.02E-02)   | 0.15    |
|                                | Negative                                   | Reference             |                         |         |
|                                | Donor BUN in mg/dL                         | 3.33E-03              | (-1.57E-04, 6.82E-03)   | 0.06    |
|                                | Donor Cigarette Use (> 20 pack years) Ever |                       |                         |         |
|                                | Positive                                   | -1.12E-01             | (-3.99E-01, 1.75E-01)   | 0.44    |
|                                | Unknown                                    | Reference             |                         |         |
|                                | Negative                                   | -9.08E-02             | (-3.73E-01, 1.91E-01)   | 0.53    |
|                                | Donor Creatinine                           | -2.37E-03             | (-2.03E-02, 1.56E-02)   | 0.80    |
| Donor eGFR                     | 4.53E-04                                   | (-7.73E-04, 1.68E-03) | 0.47                    |         |
| Donor Gender                   |                                            |                       |                         |         |
| Male                           | 1.11E-02                                   | (-6.78E-02, 9.01E-02) | 0.78                    |         |
| Female                         | Reference                                  |                       |                         |         |
| Donor Hematocrit               | 3.43E-03                                   | (-2.97E-03, 9.83E-03) | 0.29                    |         |
| Donor Hepatitis C Virus Result |                                            |                       |                         |         |
| Positive                       | 1.20E-01                                   | (-1.43E-01, 3.83E-01) | 0.37                    |         |
| Negative                       | Reference                                  |                       |                         |         |
| Donor KDRI                     | 4.13E-01                                   | (2.74E-01, 5.51E-01)  | <0.001                  |         |
| Kidney Transplanted Locally    | -6.68E-02                                  | (-1.70E-01, 3.60E-02) | 0.20                    |         |
| Kidney Pumped                  | -7.20E-03                                  | (-9.51E-02, 8.07E-02) | 0.87                    |         |
| Donor-Recipient                | HLA A Mismatches                           | -2.24E-02             | (-7.75E-02, 3.26E-02)   | 0.42    |
| Recipient                      | Age at Transplant                          | 3.83E-02              | (3.45E-02, 4.22E-02)    | <0.001  |
|                                | Latino                                     | -2.32E-01             | (-3.62E-01, -1.02E-01)  | <0.001  |
|                                | Race                                       |                       |                         |         |
|                                | Caucasian                                  | Reference             |                         |         |
|                                | Asian                                      | -2.70E-01             | (-4.49E-01, -9.14E-02)  | 0.003   |
|                                | Black                                      | -1.36E-01             | (-2.32E-01, -3.95E-02)  | 0.006   |
|                                | Other                                      | -1.95E-01             | (-4.83E-01, 9.24E-02)   | 0.18    |
|                                | Diabetes                                   |                       |                         |         |
|                                | None                                       | Reference             |                         |         |
|                                | Type 1                                     | 3.14E-01              | (1.15E-01, 5.14E-01)    | 0.002   |
|                                | Type 2                                     | 2.50E-01              | (1.20E-01, 3.79E-01)    | <0.001  |
|                                | Other                                      | 2.23E-01              | (4.13E-02, 4.05E-01)    | 0.04    |
|                                | Education                                  |                       |                         |         |
|                                | Grade School/None                          | -1.56E-01             | (-3.54E-01, 4.13E-02)   | 0.12    |
|                                | High School                                | -1.13E-02             | (-1.49E-01, 1.27E-01)   | 0.87    |
| Technical/Some College         | 3.55E-02                                   | (-1.12E-01, 1.83E-01) | 0.64                    |         |
| College                        | -8.44E-03                                  | (-1.60E-01, 1.43E-01) | 0.91                    |         |
| Unknown/Missing                | Reference                                  |                       |                         |         |
| HBV Core Antibody              |                                            |                       |                         |         |
| Positive                       | 7.41E-02                                   | (-9.26E-02, 2.41E-01) | 0.38                    |         |
| Unknown/Missing                | Reference                                  |                       |                         |         |
| Negative                       | 3.96E-02                                   | (-7.72E-02, 1.57E-01) | 0.51                    |         |

|                                                  |           |                        |        |
|--------------------------------------------------|-----------|------------------------|--------|
| HCV Serostatus                                   |           |                        |        |
| Positive                                         | 3.19E-02  | (-2.43E-01, 3.07E-01)  | 0.82   |
| Unknown/Missing                                  | Reference |                        |        |
| Negative                                         | -9.90E-02 | (-3.18E-01, 1.20E-01)  | 0.37   |
| HIV Serostatus                                   |           |                        |        |
| Positive                                         | 5.63E-01  | (1.17E-01, 1.01)       | 0.01   |
| Unknown/Missing                                  | Reference |                        |        |
| Negative                                         | 2.60E-01  | (1.17E-01, 4.03E-01)   | <0.001 |
| Had Previous Transplant                          | 2.34E-01  | (1.10E-01, 3.57E-01)   | <0.001 |
| Kidney Cold Ischemia Time in Hours               | 1.03E-02  | (5.80E-03, 1.47E-02)   | <0.001 |
| Kidney Primary Diagnosis at Transplant           |           |                        |        |
| Congenital, Rare Familial, & Metabolic Disorders | 1.48E-01  | (-2.13E-01, 5.09E-01)  | 0.42   |
| Diabetes                                         | 2.40E-01  | (8.41E-02, 3.95E-01)   | 0.003  |
| Glomerular Diseases                              | -1.08E-01 | (-2.48E-01, 3.23E-02)  | 0.13   |
| Hypertensive Nephrosclerosis                     | 1.17E-01  | (-6.32E-03, 2.40E-01)  | 0.06   |
| Unknown/Other                                    | Reference |                        |        |
| Most Recent CPRA                                 | 7.46E-04  | (-8.13E-04, 2.30E-03)  | 0.35   |
| Peripheral Vascular Disease                      |           |                        |        |
| Positive                                         | 3.53E-01  | (1.02E-01, 6.05E-01)   | 0.006  |
| Unknown                                          | Reference |                        |        |
| Negative                                         | 6.16E-03  | (-2.13E-01, 2.26E-01)  | 0.96   |
| Primary Payment                                  |           |                        |        |
| Public                                           | Reference |                        |        |
| Private/Other/Unknown                            | -2.65E-01 | (-3.68E-01, -1.63E-01) | <0.001 |
| Total ESRD Time at Transplant in Days            | 2.01E-04  | (1.71E-04, 2.31E-04)   | <0.001 |
| Total Serum Albumin at Listing                   | -2.00E-01 | (-2.75E-01, -1.24E-01) | <0.001 |
| Karnofsky Performance Score at Transplant        |           |                        |        |
| 10-30                                            | 2.42      | (2.09, 2.76)           | <0.001 |
| 40-50                                            | 2.44E-01  | (-3.60E-03, 4.91E-01)  | 0.05   |
| 60-70                                            | -2.06E-01 | (-4.12E-01, -1.02E-03) | 0.05   |
| 80-90                                            | -3.64E-01 | (-5.64E-01, -1.63E-01) | <0.001 |
| 100                                              | -4.99E-01 | (-7.24E-01, -2.73E-01) | <0.001 |
| Unknown                                          | Reference |                        |        |

Table S3: Pooled coefficients of multivariate Cox proportional hazard model of 3-year posttransplant patient survival using SRTR variables

|                                            | Covariates                           | Coefficients          | 95% Confidence Interval | P Value |
|--------------------------------------------|--------------------------------------|-----------------------|-------------------------|---------|
| Donor                                      | Donor Age                            | 3.22E-03              | (-6.50E-05, 6.51E-03)   | 0.05    |
|                                            | Donor Race                           |                       |                         |         |
|                                            | Caucasian                            | Reference             |                         |         |
|                                            | Asian                                | -7.59E-04             | (-1.91E-01, 1.90E-01)   | 0.99    |
|                                            | Black                                | 5.72E-02              | (-3.36E-02, 1.48E-01)   | 0.21    |
|                                            | Other                                | -1.71E-01             | (-5.26E-01, 1.84E-01)   | 0.34    |
|                                            | Donor Blood Type                     |                       |                         |         |
|                                            | O                                    | Reference             |                         |         |
|                                            | A                                    | 6.32E-02              | (-4.85E-04, 1.25E-01)   | 0.05    |
|                                            | AB                                   | 7.67E-02              | (-8.28E-02, 2.36E-01)   | 0.35    |
|                                            | B                                    | 3.80E-03              | (-8.79E-02, 9.55E-02)   | 0.94    |
|                                            | Donor BMI                            | 3.37E-05              | (-4.48E-03, 4.54E-03)   | 0.99    |
|                                            | Donor BUN in mg/dL                   | 3.00E-03              | (1.17E-04, 5.88E-03)    | 0.04    |
|                                            | Donor Cause of Death                 |                       |                         |         |
|                                            | Anoxia                               | 9.41E-02              | (-1.01E-01, 2.89E-01)   | 0.34    |
|                                            | Cerebrovascular/Stroke               | 9.28E-02              | (-1.01E-01, 2.87E-01)   | 0.35    |
|                                            | Head Trauma                          | 6.01E-02              | (-1.33E-01, 2.54E-01)   | 0.54    |
|                                            | Central Nervous System Tumor         | -1.32E-01             | (-6.00E-01, 3.35E-01)   | 0.58    |
|                                            | Other                                | Reference             |                         |         |
|                                            | Donor Clinical Infection of the Lung |                       |                         |         |
|                                            | Positive                             | -1.23E-01             | (-1.82E-01, -6.35E-02)  | <0.001  |
|                                            | Negative                             | Reference             |                         |         |
|                                            | Donor Creatinine                     | -4.29E-04             | (-2.04E-02, 1.95E-02)   | 0.97    |
|                                            | Donor Diuretics                      |                       |                         |         |
|                                            | Positive                             | -4.04E-02             | (-9.88E-02, 1.79E-02)   | 0.18    |
|                                            | Negative                             | Reference             |                         |         |
| Donor Drug-Treated Systematic Hypertension |                                      |                       |                         |         |
| Positive                                   | 3.49E-02                             | (-3.46E-02, 1.05E-01) | 0.33                    |         |
| Negative                                   | Reference                            |                       |                         |         |
| Donor eGFR                                 | 1.17E-03                             | (1.83E-04, 2.17E-03)  | 0.02                    |         |
| Donor Hematocrit                           | 1.79E-03                             | (-3.18E-03, 6.76E-03) | 0.48                    |         |
| Donor Hepatitis C Virus Result             |                                      |                       |                         |         |
| Positive                                   | 2.00E-01                             | (1.21E-02, 3.88E-01)  | 0.04                    |         |
| Negative                                   | Reference                            |                       |                         |         |
| Donor History of Diabetes                  |                                      |                       |                         |         |
| Positive                                   | 7.74E-02                             | (-2.56E-02, 1.80E-01) | 0.14                    |         |
| Negative                                   | Reference                            |                       |                         |         |
| Donor INR                                  | 3.68E-03                             | (-1.49E-02, 2.22E-02) | 0.70                    |         |
| Donor KDRI                                 | 3.33E-01                             | (2.04E-01, 4.62E-01)  | <0.001                  |         |
| Kidney Transplanted Locally                | 2.07E-02                             | (-5.64E-02, 9.78E-02) | 0.60                    |         |
| Kidney Pumped                              | 9.60E-03                             | (-5.84E-02, 7.76E-02) | 0.78                    |         |
| Donor Tattoos                              |                                      |                       |                         |         |
| Yes                                        | -5.66E-03                            | (-7.35E-02, 6.22E-02) | 0.87                    |         |
| No                                         | Reference                            |                       |                         |         |
| Donor-Recipient                            | HLA B Mismatches                     | 2.43E-02              | (-2.34E-02, 7.19E-02)   | 0.32    |
|                                            | HLA DR Mismatches                    | 7.69E-03              | (-3.60E-02, 5.14E-02)   | 0.73    |
| Recipient                                  | Age at Transplant                    | 3.91E-02              | (3.63E-02, 4.20E-02)    | <0.001  |
|                                            | Latino                               | -3.40E-01             | (-4.41E-01, -2.39E-01)  | <0.001  |

|                                        |                                                  |           |                        |        |
|----------------------------------------|--------------------------------------------------|-----------|------------------------|--------|
| Race                                   |                                                  |           |                        |        |
|                                        | Caucasian                                        | Reference |                        |        |
|                                        | Asian                                            | -4.04E-01 | (-5.47E-01, -2.61E-01) | <0.001 |
|                                        | Black                                            | -1.84E-01 | (-2.58E-01, -1.11E-01) | <0.001 |
|                                        | Other                                            | -2.62E-01 | (-4.89E-01, -3.56E-02) | 0.02   |
| BMI                                    |                                                  | -6.54E-03 | (-1.23E-02, -8.09E-04) | 0.03   |
| Diabetes                               |                                                  |           |                        |        |
|                                        | None                                             | Reference |                        |        |
|                                        | Type 1                                           | 3.32E-01  | (1.85E-01, 4.79E-01)   | <0.001 |
|                                        | Type 2                                           | 2.75E-01  | (1.77E-01, 3.73E-01)   | <0.001 |
|                                        | Other                                            | 2.88E-01  | (1.58E-01, 4.19E-01)   | <0.001 |
| Education                              |                                                  |           |                        |        |
|                                        | Grade School/None                                | -3.97E-02 | (-1.86E-01, 1.06E-01)  | 0.59   |
|                                        | High School                                      | 6.47E-02  | (-3.45E-02, 1.64E-01)  | 0.20   |
|                                        | Technical/Some College                           | 6.15E-02  | (-4.66E-02, 1.70E-01)  | 0.27   |
|                                        | College                                          | 4.96E-03  | (-1.05E-01, 1.15E-01)  | 0.93   |
|                                        | Unknown/Missing                                  | Reference |                        |        |
| Gender                                 |                                                  | 1.05E-01  | (4.22E-02, 1.67E-01)   | 0.001  |
| HBV Core Antibody                      |                                                  |           |                        |        |
|                                        | Positive                                         | -3.47E-02 | (-1.58E-01, 8.81E-02)  | 0.58   |
|                                        | Unknown/Missing                                  | Reference |                        |        |
|                                        | Negative                                         | -2.80E-02 | (-1.11E-01, 5.50E-02)  | 0.51   |
| HCV Serostatus                         |                                                  |           |                        |        |
|                                        | Positive                                         | 2.46E-01  | (5.15E-02, 4.40E-01)   | 0.01   |
|                                        | Unknown/Missing                                  | Reference |                        |        |
|                                        | Negative                                         | 5.97E-02  | (-9.24E-02, 2.12E-01)  | 0.44   |
| Had Previous Malignancy                |                                                  |           |                        |        |
|                                        | Positive                                         | 1.36E-01  | (-1.07E-01, 3.79E-01)  | 0.27   |
|                                        | Unknown/Missing                                  | Reference |                        |        |
|                                        | Negative                                         | 6.39E-02  | (-1.57E-01, 2.85E-01)  | 0.57   |
| Had Previous Transplant                |                                                  | 2.07E-01  | (1.12E-01, 3.02E-01)   | <0.001 |
| Kidney Cold Ischemia Time in Hours     |                                                  | 5.65E-03  | (2.35E-03, 8.96E-03)   | <0.001 |
| Kidney Primary Diagnosis at Transplant |                                                  |           |                        |        |
|                                        | Congenital, Rare Familial, & Metabolic Disorders | 1.33E-01  | (-1.47E-01, 4.14E-01)  | 0.35   |
|                                        | Diabetes                                         | 2.47E-01  | (1.30E-01, 3.64E-01)   | <0.001 |
|                                        | Glomerular Diseases                              | -4.91E-02 | (-1.53E-01, 5.50E-02)  | 0.36   |
|                                        | Hypertensive Nephrosclerosis                     | 1.54E-01  | (6.16E-02, 2.47E-01)   | 0.001  |
|                                        | Unknown/Other                                    | Reference |                        |        |
| Most Recent CPRA                       |                                                  | 1.22E-03  | (8.11E-06, 2.42E-03)   | 0.05   |
| Peripheral Vascular Disease            |                                                  |           |                        |        |
|                                        | Positive                                         | 2.68E-01  | (6.49E-02, 4.71E-01)   | 0.01   |
|                                        | Unknown                                          | Reference |                        |        |
|                                        | Negative                                         | -1.48E-01 | (-3.29E-01, 3.30E-02)  | 0.11   |
| Primary Payment                        |                                                  |           |                        |        |
|                                        | Public                                           | Reference |                        |        |
|                                        | Private/Other/Unknown                            | -2.17E-01 | (-2.90E-01, -1.44E-01) | <0.001 |
| Procedure Type                         |                                                  |           |                        |        |
|                                        | Left Kidney                                      | Reference |                        |        |
|                                        | Right Kidney                                     | 3.48E-03  | (-5.29E-02, 5.99E-02)  | 0.90   |
| Total ESRD Time at Transplant in Days  |                                                  | 1.87E-04  | (1.64E-04, 2.10E-04)   | <0.001 |
| Total Serum Albumin at Listing         |                                                  | -1.80E-01 | (-2.33E-01, -1.26E-01) | <0.001 |

Table S4: Pooled coefficients of multivariate Cox proportional hazard model of 3-year posttransplant patient survival using SRTR variables and KPS

|                                | Covariates                                 | Coefficients          | 95% Confidence Interval | P Value |
|--------------------------------|--------------------------------------------|-----------------------|-------------------------|---------|
| Donor                          | Donor Age                                  | 3.32E-03              | (3.14E-05, 6.60E-03)    | 0.05    |
|                                | Donor Race                                 |                       |                         |         |
|                                | Caucasian                                  | Reference             |                         |         |
|                                | Asian                                      | 1.71E-02              | (-1.73E-01, 2.08E-01)   | 0.86    |
|                                | Black                                      | 5.71E-02              | (-3.36E-02, 1.48E-01)   | 0.22    |
|                                | Other                                      | -1.53E-01             | (-5.08E-01, 2.02E-01)   | 0.40    |
|                                | Donor Blood Type                           |                       |                         |         |
|                                | O                                          | Reference             |                         |         |
|                                | A                                          | 6.59E-02              | (3.19E-03, 1.29E-01)    | 0.04    |
|                                | AB                                         | 6.22E-02              | (-9.74E-02, 2.22E-01)   | 0.45    |
|                                | B                                          | 7.21E-04              | (-9.11E-02, 9.25E-02)   | 0.99    |
|                                | Donor BMI                                  | -3.47E-04             | (-4.86E-03, 4.16E-03)   | 0.88    |
|                                | Donor BUN in mg/dL                         | 3.33E-03              | (4.55E-04, 6.20E-03)    | 0.02    |
|                                | Donor Cause of Death                       |                       |                         |         |
|                                | Anoxia                                     | 8.26E-02              | (-1.12E-01, 2.78E-01)   | 0.41    |
|                                | Cerebrovascular/Stroke                     | 8.26E-02              | (-1.12E-01, 2.77E-01)   | 0.40    |
|                                | Head Trauma                                | 5.13E-02              | (-1.42E-01, 2.45E-01)   | 0.60    |
|                                | Central Nervous System Tumor               | -1.38E-01             | (-6.06E-01, 3.29E-01)   | 0.56    |
|                                | Other                                      | Reference             |                         |         |
|                                | Donor Clinical Infection of the Lung       |                       |                         |         |
|                                | Positive                                   | -1.33E-01             | (-1.92E-01, -7.37E-02)  | <0.001  |
|                                | Negative                                   | Reference             |                         |         |
|                                | Donor Creatinine                           | -4.03E-04             | (-2.04E-02, 1.96E-02)   | 0.97    |
|                                | Donor Diuretics                            |                       |                         |         |
|                                | Positive                                   | -4.89E-02             | (-1.07E-01, 9.53E-03)   | 0.10    |
|                                | Negative                                   | Reference             |                         |         |
|                                | Donor Drug-Treated Systematic Hypertension |                       |                         |         |
| Positive                       | 3.90E-02                                   | (-3.06E-02, 1.09E-01) | 0.27                    |         |
| Negative                       | Reference                                  |                       |                         |         |
| Donor eGFR                     | 1.18E-03                                   | (1.92E-04, 2.17E-03)  | 0.02                    |         |
| Donor Hematocrit               | 1.72E-03                                   | (-3.25E-03, 6.69E-03) | 0.50                    |         |
| Donor Hepatitis C Virus Result |                                            |                       |                         |         |
| Positive                       | 2.11E-01                                   | (2.28E-02, 3.99E-01)  | 0.03                    |         |
| Negative                       | Reference                                  |                       |                         |         |
| Donor History of Diabetes      |                                            |                       |                         |         |
| Positive                       | 7.83E-02                                   | (-2.47E-02, 1.81E-01) | 0.14                    |         |
| Negative                       | Reference                                  |                       |                         |         |
| Donor INR                      | 3.84E-03                                   | (-1.49E-02, 2.26E-02) | 0.69                    |         |
| Donor KDRI                     | 3.34E-01                                   | (2.05E-01, 4.63E-01)  | <0.001                  |         |
| Kidney Transplanted Locally    | 1.65E-02                                   | (-6.08E-02, 9.38E-02) | 0.68                    |         |
| Kidney Pumped                  | -1.28E-02                                  | (-8.09E-02, 5.53E-02) | 0.71                    |         |
| Donor Tattoos                  |                                            |                       |                         |         |
| Yes                            | -4.16E-03                                  | (-7.20E-02, 6.37E-02) | 0.90                    |         |
| No                             | Reference                                  |                       |                         |         |
| Donor-Recipient                | HLA B Mismatches                           | 2.52E-02              | (-2.25E-02, 7.28E-02)   | 0.32    |
|                                | HLA DR Mismatches                          | 3.32E-03              | (-4.04E-02, 4.70E-02)   | 0.88    |
| Recipient                      | Age at Transplant                          | 3.92E-02              | (3.63E-02, 4.21E-02)    | <0.001  |
|                                | Latino                                     | -3.38E-01             | (-4.39E-01, -2.37E-01)  | <0.001  |



|                                           |                                                  |           |                        |        |
|-------------------------------------------|--------------------------------------------------|-----------|------------------------|--------|
| Race                                      |                                                  |           |                        |        |
|                                           | Caucasian                                        | Reference |                        |        |
|                                           | Asian                                            | -4.07E-01 | (-5.50E-01, -2.63E-01) | <0.001 |
|                                           | Black                                            | -1.81E-01 | (-2.54E-01, -1.08E-01) | <0.001 |
|                                           | Other                                            | -2.61E-01 | (-4.88E-01, -3.47E-02) | 0.02   |
| BMI                                       |                                                  | -6.53E-03 | (-1.23E-02, -8.01E-04) | 0.03   |
| Diabetes                                  |                                                  |           |                        |        |
|                                           | None                                             | Reference |                        |        |
|                                           | Type 1                                           | 3.23E-01  | (1.75E-01, 4.70E-01)   | <0.001 |
|                                           | Type 2                                           | 2.70E-01  | (1.71E-01, 3.68E-01)   | <0.001 |
|                                           | Other                                            | 2.77E-01  | (1.47E-01, 4.08E-01)   | <0.001 |
| Education                                 |                                                  |           |                        |        |
|                                           | Grade School/None                                | -5.43E-02 | (-2.01E-01, 9.23E-02)  | 0.47   |
|                                           | High School                                      | 5.18E-02  | (-4.79E-02, 1.52E-01)  | 0.31   |
|                                           | Technical/Some College                           | 6.13E-02  | (-4.72E-02, 1.70E-01)  | 0.27   |
|                                           | College                                          | 4.58E-03  | (-1.06E-01, 1.15E-01)  | 0.94   |
|                                           | Unknown/Missing                                  | Reference |                        |        |
| Gender                                    |                                                  | 1.07E-01  | (4.41E-02, 1.69E-01)   | <0.001 |
| HBV Core Antibody                         |                                                  |           |                        |        |
|                                           | Positive                                         | -1.49E-03 | (-1.25E-01, 1.22E-01)  | 0.98   |
|                                           | Unknown/Missing                                  | Reference |                        |        |
|                                           | Negative                                         | -5.53E-04 | (-8.40E-02, 8.29E-02)  | 0.99   |
| HCV Serostatus                            |                                                  |           |                        |        |
|                                           | Positive                                         | 2.42E-01  | (4.78E-02, 4.36E-01)   | 0.01   |
|                                           | Unknown/Missing                                  | Reference |                        |        |
|                                           | Negative                                         | 6.06E-02  | (-9.13E-02, 2.13E-01)  | 0.43   |
| Had Previous Malignancy                   |                                                  |           |                        |        |
|                                           | Positive                                         | 1.42E-01  | (-1.00E-01, 3.85E-01)  | 0.25   |
|                                           | Unknown/Missing                                  | Reference |                        |        |
|                                           | Negative                                         | 6.54E-02  | (-1.55E-01, 2.86E-01)  | 0.56   |
| Had Previous Transplant                   |                                                  | 1.96E-01  | (1.01E-01, 2.91E-01)   | <0.001 |
| Kidney Cold Ischemia Time in Hours        |                                                  | 6.78E-03  | (3.42E-03, 1.01E-02)   | <0.001 |
| Kidney Primary Diagnosis at Transplant    |                                                  |           |                        |        |
|                                           | Congenital, Rare Familial, & Metabolic Disorders | 1.07E-01  | (-1.74E-01, 3.88E-01)  | 0.45   |
|                                           | Diabetes                                         | 2.27E-01  | (1.10E-01, 3.44E-01)   | <0.001 |
|                                           | Glomerular Diseases                              | -4.95E-02 | (-1.54E-01, 5.48E-02)  | 0.35   |
|                                           | Hypertensive Nephrosclerosis                     | 1.52E-01  | (5.88E-02, 2.44E-01)   | 0.001  |
|                                           | Unknown/Other                                    | Reference |                        |        |
| Most Recent CPRA                          |                                                  | 1.14E-03  | (-6.92E-05, 2.35E-03)  | 0.06   |
| Peripheral Vascular Disease               |                                                  |           |                        |        |
|                                           | Positive                                         | 2.62E-01  | (5.83E-02, 4.65E-01)   | 0.01   |
|                                           | Unknown                                          | Reference |                        |        |
|                                           | Negative                                         | -1.32E-01 | (-3.13E-01, 4.89E-02)  | 0.15   |
| Primary Payment                           |                                                  |           |                        |        |
|                                           | Public                                           | Reference |                        |        |
|                                           | Private/Other/Unknown                            | -1.90E-01 | (-2.64E-01, -1.17E-01) | <0.001 |
| Procedure Type                            |                                                  |           |                        |        |
|                                           | Left Kidney                                      | Reference |                        |        |
|                                           | Right Kidney                                     | 5.44E-03  | (-5.10E-02, 6.18E-02)  | 0.85   |
| Total ESRD Time at Transplant in Days     |                                                  | 1.84E-04  | (1.61E-04, 2.07E-04)   | <0.001 |
| Total Serum Albumin at Listing            |                                                  | -1.71E-01 | (-2.24E-01, -1.17E-01) | <0.001 |
| Karnofsky Performance Score at Transplant |                                                  |           |                        |        |
|                                           | 10-30                                            | 2.34      | (2.01, 2.66)           | <0.001 |
|                                           | 40-50                                            | 3.95E-01  | (1.98E-01, 5.93E-01)   | <0.001 |
|                                           | 60-70                                            | 1.38E-01  | (-2.58E-02, 3.01E-01)  | 0.10   |
|                                           | 80-90                                            | -3.08E-02 | (-1.90E-01, 1.28E-01)  | 0.70   |
|                                           | 100                                              | -1.84E-01 | (-3.60E-01, -8.79E-03) | 0.04   |
|                                           | Unknown                                          | Reference |                        |        |
